# Supplementary material for: Biocompatible metal–organic frameworks as promising platforms to eradicate HIV reservoirs ex vivo in people living with HIV
Source: Royal Society of Chemistry journal article supplement (doi:10.1039/d4tb00272e), 2024-01-01
Supplement: d4tb00272e1.pdf [file d4tb00272e1.pdf]

## Supplementary Information

### **Biocompatible metal-organic frameworks as promising platforms to eradicate HIV reservoirs *ex-vivo* in people living with HIV**

José A. Lebrón,<sup>†a</sup> Francisco J. Ostos,<sup>†b,c</sup> Marta Martínez-Santa,<sup>a</sup> Francisco García-Moscoso,<sup>d</sup> Manuel López-López,<sup>e</sup> María L. Moyá,<sup>a</sup> Eva Bernal,<sup>a</sup> Sara Bachiller,<sup>b,c</sup> Gabriel González-Ulloa,<sup>b,c</sup> David Rodríguez-Lucena,<sup>d</sup> Tania Lopes-Costa,<sup>d</sup> Rut Fernández-Torres,<sup>f</sup> Ezequiel Ruiz-Mateos,<sup>c</sup> José M. Pedrosa,<sup>d</sup> Mohammed Rafii-El-Idrissi Benhnia,<sup>b,c\*</sup> Pilar López-Cornejo,<sup>a\*</sup>

<sup>a</sup>Department of Physical Chemistry, Faculty of Chemistry, University of Seville, C/Prof. García González 1, 41012 Seville, Spain. <sup>b</sup>Department of Medical Biochemistry, Molecular Biology, and Immunology, School of Medicine, University of Seville, 41009 Seville, Spain. <sup>c</sup>Institute of Biomedicine of Seville, IBiS/Virgen del Rocío University Hospital/CSIC/ University of Seville, Clinical Unit of Infectious Diseases, Microbiology and Parasitology, 41013 Seville, Spain. <sup>d</sup>Department of Physical, Chemical and Natural Systems, University Pablo de Olavide, Ctra. Utrera Km. 1, 41013, Seville, Spain. <sup>e</sup>Department of Chemical Engineering, Physical Chemistry and Materials Science, Campus 'El Carmen', Faculty of Experimental Sciences, University of Huelva, 21071, Huelva, Spain. <sup>f</sup>Department of Analytical Chemistry, Faculty of Chemistry, University of Seville, c/Prof. García González, 1, 41012, Seville, Spain.

<sup>†</sup>Authors with equally contribution

\*Authors to whom all the correspondence must be sent

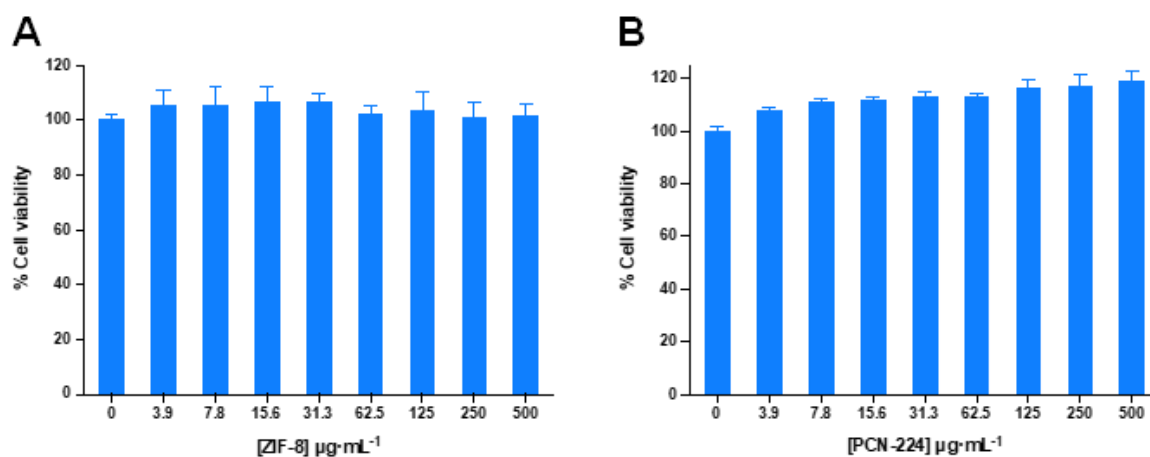

**Fig. S1** Cell viability values by LDH assay in the presence of different MOF concentrations for 6 h in PBMCs: **A**) ZIF-8 and **B**) PCN-224. Each MOF concentration was measured in triplicates and the experiments were repeated thrice independently. 1X PBS (MOF, 0 g mL<sup>-1</sup>) was used as negative control. Error bars represent standard deviation values. 2way ANOVA Dunnett's multiple comparisons test was applied comparing different concentration of MOF concentrations with the negative control. No significant difference was found between the different concentration of MOF concentrations and the negative control ( $P > 0.05$ ).

---

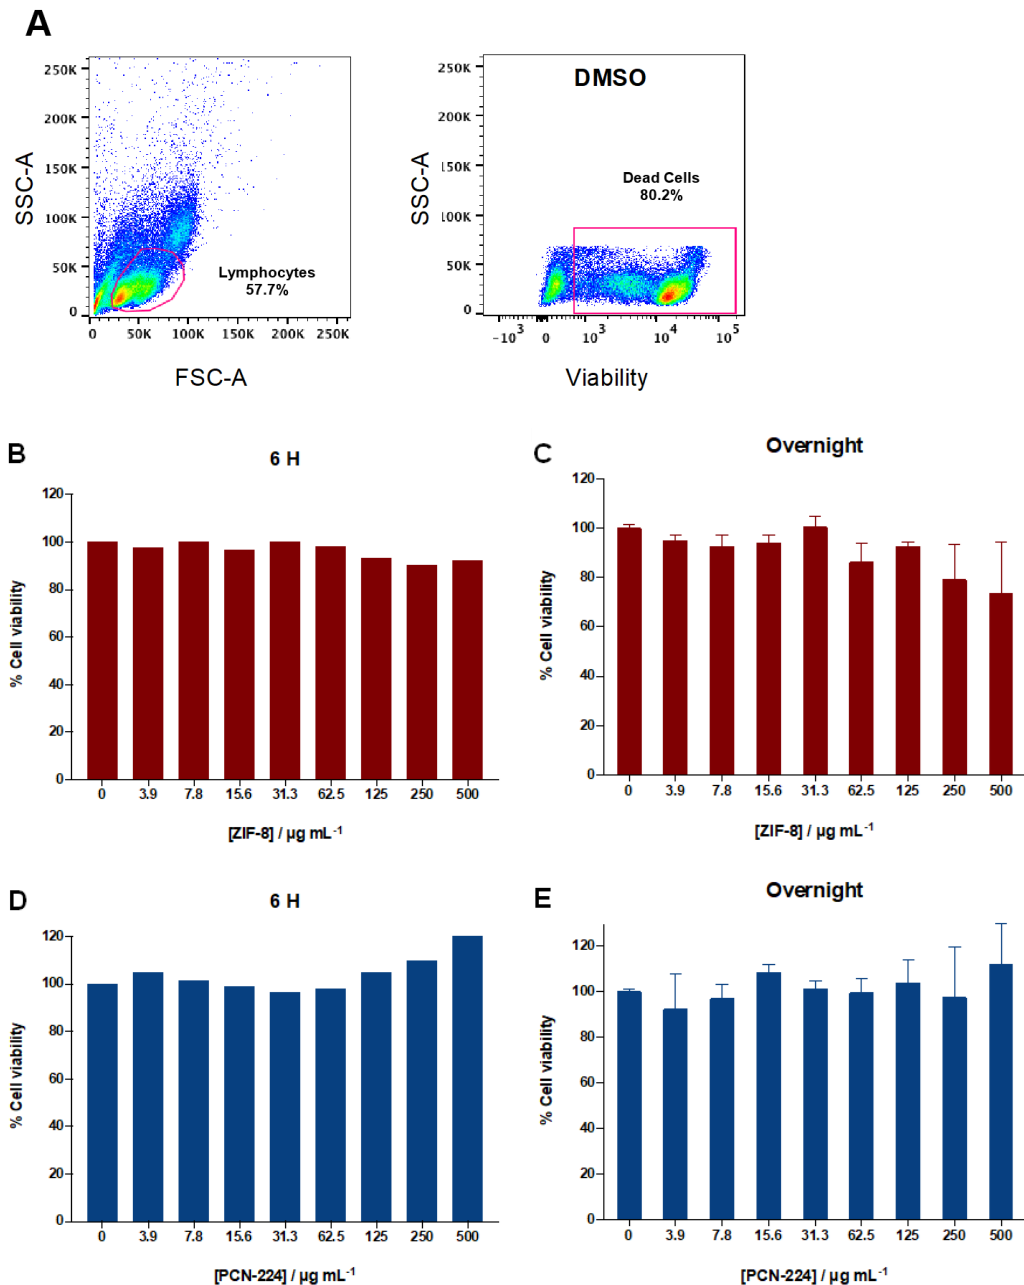

**Fig. S2** PBMCs viability (%) by flow cytometry in the presence of different MOF concentrations for 6 h (B, D) and overnight incubation (C, E). **A**) Pseudocolor dot plots showing the gating strategy used for the identification of dead cells in a representative sample. Mononuclear cells were selected according to their size (FSC-A) and complexity (SSC-A). Dead cells after 6 h treatment with DMSO as positive control were selected using a viability marker, aqua-fluorescent reactive dye. **B-E**) Bars graph show the percentage of viable cells after the treatment with different MOF concentrations of ZIF-8 or PCN-224 for 6 h (**B** or **D**) and overnight (**C** or **E**). 1X PBS (MOF, 0  $\mu\text{g mL}^{-1}$ ) was used as negative control. The experiments were repeated twice independently for overnight (**C** or **E**). Error bars represent standard deviation values. 2way ANOVA Dunnett's multiple comparisons test was applied. No significant difference was found between the different concentration of MOF concentrations and the negative control ( $P > 0.05$ ).

**Table S1** % Antiretroviral agents and TLR agonists released from ZIF-8 and PCN-224

|         |     | cARTs (%) |         |         |         | TLR agonists (%) |         |       |
|---------|-----|-----------|---------|---------|---------|------------------|---------|-------|
| MOF     | pH  | TFV       | FTC     | NVP     | BIC     | TLR-7            | TLR-9   |       |
| ZIF-8   | 5.5 | cART-1    | 90±2    | 3.5±1.5 | 98±5    | ---              | 1.3±0.5 | 93±5  |
|         |     | cART-2    | 98±5    | 6.4±0.4 | ---     | 1.2±0.2          |         |       |
|         | 7.4 | cART-1    | 93±7    | 2.3±1.3 | 99±7    | ---              | 3.0±0.3 | 98±2  |
|         |     | cART-2    | 95±9    | 5.3±0.3 | ---     | 2.3±0.7          |         |       |
| PCN-224 | 2.2 | cART-1    | 4.8±1.9 | 8.0±2.8 | 9.1±1.4 | ---              | 3.9±0.2 | 100±7 |
|         |     | cART-2    | 11±1    | 14±1    | ---     | 5.2±0.3          |         |       |
|         | 5.5 | cART-1    | 7.0±1.9 | 7.1±1.0 | 5.6±1.1 | ---              | 11±1    | 100±5 |
|         |     | cART-2    | 9.1±0.2 | 9.9±1.0 | ---     | 3.6±0.7          |         |       |
|         | 7.4 | cART-1    | 3.7±1.3 | 8.6±1.7 | 7.2±1.7 | ---              | ~0.0    | ~0.0  |
|         |     | cART-2    | 3.7±1.2 | 11±1    | ---     | 8.3±1.7          |         |       |

Values in this table are given as mean value ± standard deviation. The experiments were repeated thrice independently. cART-1 and -2 represent the combined antiretroviral therapy TFV + FTC + NVP and TFV + FTC + BIC, respectively.

**Table S2** Release rate constant for TLR agonists in ZIF-8 and PCN-224 at different pH values

| pH  | k / days <sup>-1</sup> |             |               |           |
|-----|------------------------|-------------|---------------|-----------|
|     | TLR-7 agonist          |             | TLR-9 agonist |           |
|     | ZIF-8                  | PCN-224     | ZIF-8         | PCN-224   |
| 2.2 | ---                    | 0.042±0.015 | ---           | 0.21±0.05 |
| 5.5 | 0.21±0.02              | 0.059±0.014 | 0.30±0.09     | 0.59±0.01 |
| 7.4 | 0.36±0.08              | ---         | 1.02±0.10     | ---       |

Values in this table are given as mean value ± standard deviation. The experiments were repeated thrice independently.

**Table S3** Instrumental parameters

|                                           | TFV                                   | FTC                                        | NVP              | BIC      |
|-------------------------------------------|---------------------------------------|--------------------------------------------|------------------|----------|
| <b>Retention time (min)</b>               | 1.9                                   | 3.4                                        | 5.2              | 7.2      |
| <b>Ionization (ESI)</b>                   | Positive                              |                                            |                  |          |
| <b><i>m/z</i> (Da), [M+H]<sup>+</sup></b> | 288.0999                              | 130.0565                                   | 267.1357         | 450.1329 |
| <b>Capillary (kV)</b>                     | 2.0                                   |                                            |                  |          |
| <b>Sampling cone (V)</b>                  | 40                                    | <b>Source Offset</b>                       | 80               |          |
| <b>Source T (°C)</b>                      | 100                                   | <b>Desolvation T (°C)</b>                  | 400              |          |
| <b>Scan range</b>                         | 50-800 Da                             | <b>Scan time (s)</b>                       | 0.8/<br>centroid |          |
| <b>Cone gas (L/h) N<sub>2</sub></b>       | 30                                    | <b>Desolvation gas (L/h) N<sub>2</sub></b> | 600              |          |
| <b>Instrument</b>                         | Acquity UPLC-Xevo G2-S Q-TOF (Waters) |                                            |                  |          |

**Table S4** Analytical Validation Data

| Analyte    | Linear range<br>( $\mu\text{g}\cdot\text{L}^{-1}$ ) | $(R^2)$ | LOD<br>( $\mu\text{g}\cdot\text{L}^{-1}$ ) | LOQ<br>( $\mu\text{g}\cdot\text{L}^{-1}$ ) | Rep/IP (%RSD) |         |         |
|------------|-----------------------------------------------------|---------|--------------------------------------------|--------------------------------------------|---------------|---------|---------|
|            |                                                     |         |                                            |                                            | 5*            | 50      | 250     |
| <b>TNF</b> | 1.0-500                                             | 0.9968  | 0.50                                       | 1.0                                        | 4.1/6.2       | 3.8/5.1 | 4.3/6.3 |
| <b>EMT</b> | 1.0-500                                             | 0.9966  | 0.63                                       | 2.1                                        | 3.3/4.6       | 2.2/5.5 | 3.8/4.8 |
| <b>NVP</b> | 1.0-500                                             | 0.9976  | 0.55                                       | 0.90                                       | 5.1/6.5       | 5.6/7.1 | 4.1/6.3 |
| <b>BIC</b> | 10-1000                                             | 0.9962  | 4.6                                        | 9.6                                        | 2.1/3.5       | 1.3/4.0 | 2.1/4.2 |

\*BIC low level was evaluated at  $15 \mu\text{g}\cdot\text{L}^{-1}$
